# Supplementary material for: Micromorphological characteristics of sandy forest soils recently impacted by wildfires in Russia
Source: Copernicus journal article supplement (doi:10.5194/se-2016-173), 2017-01-30
Supplement: Supplementary file [file se-2016-173-AC1-supplement.pdf]

# Micromorphological characteristics of sandy forest soils recently impacted by wildfires in Russia

Ekaterina Maksimova<sup>1,2</sup>, Evgeny Abakumov<sup>1,2</sup>

<sup>1</sup>Saint-Petersburg State University, Saint-Petersburg, Russia

<sup>2</sup>Institute of Ecology of Volga Basin, Togliatty, Russia

*Correspondence to:* Ekaterina Maksimova (doublemax@yandex.ru)

**Abstract.** Two fire affected soils have been studied using micromorphological methods. The objective of the paper is to assess and compare fire effects on micropedological organization of soils in a forest steppe zone of the Central Russia (Volga Basin, Togliatty city). Samples were collected in the green zone of Togliatty city. The results showed that both soils were rich in quartz, feldspar. Mica was highly present in soils affected by surface fires, while calcium carbonates were identified in the soils affected by crowns. The type of plasma is humus-clay, but the soil assemblage is plasma-silt with the prevalence of the silt. Angular and subangular grains are the most dominant in soil particulates. No evidence of intensive weathering was detected. There was a decreasing of the porosity in soils affected by fires as consequence of soil pores filled with ash and charcoal.

## 1 Introduction

Fire has an important impact on soil properties as identified by previous works (Certini, 2005; Certini, 2013; Guénon et al., 2013; Mataix-Solera et al., 2011; Jain Theresa et al., 2012; Bergeron et al., 2013; Dymov, Gabov, 2015; Zharikova, 2015; Maximova, Abakumov, 2015). Soil processes in postfire soils environments is quite different from those in soils of natural landscapes or in thechnogenous ones. In general, changes in morphological organization and soil mineralogy are well known in soils after fires produced at high temperatures. After the fire, there is an accumulation of ash on topsoil (Pereira et al., 2014), leaching of some nutrients into deeper horizons (Bodi et al., 2014), over-compaction of the surface and accumulation of crusts, transformation of soil structure (Mataix et al., 2011).

Micromorphological methods are known as useful tool for investigation of soil transformation under natural and human-impacted conditions (Stoops, 2009). Methodology of classical micropedology provides with required information about soil development in micro level, such as changes in fine earth composition and soil plasma evolution (Kubiena, 1938, 1967; Stoops and Eswaran, 1986). These methods are widely used for analysis of soil paleo processes (Sedov et al., 2013), soil restoration on post-mining environments (Abakumov et al., 2005), soil elementary process in different environments (Lebedeva et al., 2010; Abakumov et al., 2013) and specification soil classification aspects (Kubiena, 1967). Micromorphological investigations related to fire effect of soil crusts and fine earth (Greene et al., 1990) and aggregate dynamics in post-fire soil (Mataix-Solera et al., 2002) have been undertaken. However, the micromorphological methods have never been applied to study post-fire soils transformation in the Russian wild-fire environments. Moreover, this paper deals with comparison of different post-fire scenarios (surface and crown fires) and provide 5-year monitoring of fire affected soils and ecosystems in a whole. Few researches were carried out about this topic.

1 The objective of this work was to characterize the micromorphological indices of microstructure transformation  
2 in soils affected by different types of wild-fire, as compared microstructure of mature, unaffected soil of pine  
3 forests in Central Russia.

## 4 **2 Materials and methods**

### 5 **2.1 Study area**

6 The study was conducted in Samara region situated near the Volga River, in the central part of European Russia,  
7 Samara region (N 58°39'44.55"; E 39°17'48.95", 179 m asl). The extremely hot weather in summer of 2010 in  
8 Russia (especially the most difficult situation was on whole Russian European area and also Ukraine and Eastern  
9 Europe) resulted in drought and eventually catastrophic forest fires on the vast territories of European and Siberian  
10 Russia. The forest fire studied occurred in 2010 and affected more than 8000 hectares. Fire severity was very high.  
11 Parent material is composed by old (Pleistocene) alluvial-dune landscape.

12 The affected ecosystem is characterized by a forest-steppe environment with higher pedodiversity. The vegetation  
13 was composed mostly by pine forests *Pinus sylvestris L.* There are xerophyte species at dry locations like *Veronica*  
14 *spicata L.*, *Sedum acre L.*, *Antennaria dioica L.*, *Calamagrostis epigeios (L.) Roth.*, *Centaurea marschalliana*  
15 *Spreng* and hardwoods (*Quercus robur L.*, *Betula pendula Roth.*, *Populus tremula L.*) in more humid conditions.  
16 The herbaceous vegetation consists of rhizomatous and loose-bunch gramin (*Bromus inermis Leyss.*, *Elytrigia*  
17 *repens L.*, some species of *Poa*, and *Agrostis canina L.*) at post-fire plots.

18 A variety of Luvisols and Chernozems prevails in the watershed sections (Nosin, 1949; Vasil'eva, Baranova, 2007;  
19 Abakumov, Gagarina, 2008; Abakumov et al., 2009; Urusevskaja et al., 2000). Whereas, Calcic Chernozems  
20 (southern type) dominate in the south of the region (steppe zone of the Samara region), accompanied with some  
21 polypedons of Kastanozems (Nosin, 1949). Soils of investigated area are sandy and sandy loam textured. In the  
22 studied area, soils were classified as sandy loam soils on Late Pleistocene alluvial Volga sands – Protoargic  
23 Arenosols according to World reference base (2015), and they have weak features of illuvial phenomena without  
24 formation of separate horizons. Sand content in these soils is 70.5-86.4%; clay content is 0.3-2.6 %.

25 Three soil pits were sampled in two different fire affected areas: one in a site affected by a surface forest fire and  
26 another affected by a crown fire. A sample was collected in an unburned area to serve as control. Soil types and  
27 vegetation were the same. Soils were sampled as fast as possible after the removal of a state of emergency from  
28 the territory in summer of 2010, and also during the period 2011-2015. Three soil pits were sampled at each studied  
29 area made at each plot. The general characteristics of the soils, including the chemical and physical parameters,  
30 were determined by standard methods (Methods of Soil Analysis, 1996). The measurements of these soil properties  
31 were performed in triplicate. The normal distribution of the data was verified previously, and analysis of variance  
32 (ANOVA) and a post hoc test were conducted using SIGMAPLOT 8.0 software with the aim of comparing  
33 differences between plots (site effect). Differences were considered significant at  $p < 0.05$ . Undisturbed and  
34 postpyrogenic soil samples were collected in 2011 using Kubiena-type boxes of 5x3.5x1.5 cm sizes at the depth  
35 of 0-10 cm and taken to the laboratory.

## 2.2 Micromorphological analysis

Soil samples were air-dried and being passed through a 1-mm sieve. Fine sections of soil material were prepared form micro monoliths of soils, sampled in field. Samples were dried and saturated with resin.

Thin sections were investigated with use of polarization microscope Leico DFC 320 in transmitted light and crossed nicols. The following soil micromorphological indexes have been investigated: soil microfabric, spatial arrangements of fabric units, soil particles distribution, elements of microstructure and character of organic matter. Terminology, used in this paper are published by Stoops (2003), also by Gagarina (2004) manuals and Gerasimova (2011) review, where details of micro organization of soil were described in details.

## 3 Results and discussion

### 3.1 Soil profile analysis and physico-chemical properties

The soil profile organization can be described as: **Apyr (or O in case of control) – AY – AC – C**. The **Apyr** horizon is a black layer due the deposition of an ash and charcoal layer on soil surface, contrary to the observed in the control plot (fig. 1,2,3). **A wide distribution of coal pieces, a total absence of forest floor remnants and its transformation into ash was diagnosed in 2010 immediately after fires. At the beginning of the research (2010), thick black horizons were observed on the soil surface, while in the summer of 2011, they were present as only a thin layer on the surface. This testifies to the influence on erosion, as the soil surface has been affected by precipitations after the disappearance of forest floor (Robichaud, 2005; Vieira et al., 2014; Delwiche, 2009).**

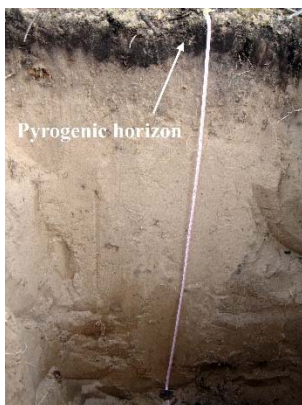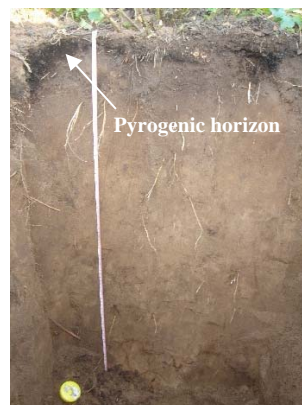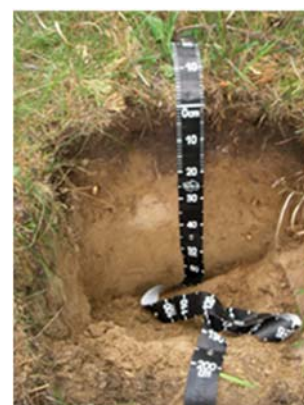

**Figure 1: Crown fire affected soil. Figure 2: Surface fire affected soil. Figure 3: Control soil.**

Data on the general characteristics of the soils are given in Table 1.

Organic matter is lost from the surface horizons of the soil, which is related to the destruction of the organic horizons, the mineralization of root residues, and the almost complete absence of fresh plant waste, which could be a material for humification. **Humus degradation of the upper horizons was clearly visible by means of the ignition loss value. Ignition loss was more than 20.00% in the upper layer in the control plot (table 1), but only 5.45% in the crown fire and 5.68% in the surface fire.** In 2010, the content of organic matter in the ash on the soil surface after the surface fire ( $2.31 \pm 0.27\%$ ) was lower than that after the crown fire ( $3.19 \pm 0.19\%$ ). A similar tendency was observed in the pyrogenically transformed humus-enriched horizons: the content of organic carbon was  $1.21 \pm 0.50\%$  after the surface fire and  $1.42 \pm 0.31\%$  after the crown fire. Thus, a surface fire, which leads to the complete burning out of the litter and the upper horizons, results in larger losses of organic matter.

1 The acidity in the upper horizons of the burnt soils decreases significantly, and the burnt litters have an alkaline  
2 reaction (pH 7.9-8.0), while the lower horizons have a weakly acid reaction close to that in the corresponding  
3 horizon of the undisturbed forest soil (pH 5.7-5.9). The increase in the pH values of the soils after fires is related  
4 to the fact that the water-soluble ash components penetrate into the soil and saturate the soil exchange complex  
5 with alkaline-earth elements, which shifts the reaction toward the neutral value. No differences in the pH changes  
6 between the effects of the crown and surface fires were observed in the first year of the study. The reaction of the  
7 parent rock is similar in all three plots and is characterized as weakly acid. The partial or sometimes complete  
8 mineralization of organic residues because of pyrolysis resulted in the synchronous input of ash elements onto the  
9 soil surface and into the litter, which neutralized the organic acids arriving in the soil solution during the  
10 decomposition of the litters. It is therefore obvious that the higher the ash yield (i.e. the more intensive the fire),  
11 the more complete and active the neutralization of the litters.

12 The group humus composition (Cha to Cfa ratio) of the upper soil layers changed as a result of the fires (Table 1).  
13 Some authors have noted an increase in humic acid content and a decrease in the carbon-to-nitrogen ratio  
14 (Abakumov and Frouz 2009; Efremova and Efremov 2006). On the contrary, the appearance of the most aggressive  
15 fractions presented by fulvic acids was recorded in other studies (Dobrovolskij 2002). In our case, the litter of the  
16 control plot was characterized by a fulvic-humic type of humus (for the other horizons, humic-fulvic) and an  
17 increase in humic acids, which was especially strong after the surface fire, as characteristic for postpyrogenic soils.  
18 A reduction of the Cha/Cfa ratio due to new plant litter was observed in the following years. An increase in humic  
19 acid content was also observed in the humus horizon.

20 A year after the fire, the pH of the burnt litters decreased from 7.9-8.0 (in 2010) to 6.4-6.6 (in 2011), and its  
21 absolute values approached the control level. This is easily explicable: rain and snowmelt waters almost completely  
22 removed the soluble ash components for a year; i.e. the alkali elements were removed from the ash at the fire sites.  
23 Post-hoc test has shown that significant differences were revealed for carbon content between surface fire and  
24 crown fire ( $p < 0.02$ ), between control and crown fire ( $p < 0.05$ ) and also between control and surface fire plot  
25 ( $p < 0.01$ ). As for silt-and-clay fraction there were differences only between control and surface fire ( $p < 0.04$ ). The  
26 same situation was characteristic for sand fraction ( $p < 0.02$ ).

27 The WRB system (World reference base..., 2015) does not have any horizons or diagnostic parameters of  
28 pyrogenic soils. But WRB system has Pretic horizon as dark, high content of organic matter and phosphorous, low  
29 biological activity, high contents of exchangeable calcium and magnesium, with remnants of charcoal and/or  
30 artefacts. A pyrogenic horizon with abundance of charcoal is formed after wildfires. It can resist to degradation  
31 when vegetation has not started to recover yet at burned places and charcoal has not started to redistribute while  
32 erosion and infiltration processes. However, black carbon decomposition is controversial, and there are different  
33 views about this issue. Some studies argue that black carbon decomposes very slowly (Liu et al., 2008) or  
34 practically non-degradable (González-Pérez et al., 2004), while others show that it successfully affected by  
35 chemical (Cheng et al., 2006, 2008) and microbial (Knicker et al., 2013; Marschner et al., 2008) oxidation. The  
36 assumption of black carbon complete stability in soils is doubtful because its content varies considerably in  
37 different soils that is explained not only by a difference of pyrogenic activity in different natural zones, but also  
38 by a difference of humidity (Nguyen, Lehmann, 2009) and temperature (Cheng C.H. et al., 2008; Nguyen et al.,  
39 2010), by various physical and chemical soil characteristics, different biological activity and land use practices  
40 (Czimczik, Masiello, 2007).

### 3.2 Micromorphological characteristics

Differences of postpyrogenic and unburned soils are well-shown in morphological, chemical, physical and biological properties of horizon A. Morphological organization of solum in burned soils differ from unburned in a number of parameters: wide distribution of charcoal pieces, absence of litter and its transformation into ash that is a mix of mineral soil components, burned-down plant residues, and small pieces of charcoal (Bodi et al., 2014; Pereira et al., 2014, 2015); an also reduction of the humic horizon's depth. There is a soil erosion because of rainfall characterized by decrease of black surface horizon thickness after several years of investigation as observed in early studies (Francos et al., 2016).

Data on soil micro morphological features are presented in table 2, fig. 4. The results showed that elementary assemblage of crown fire soil is plasma-silt (with small content of plasma and prevalence of silt particles). In case of the soil affected by surface fire, the type of assemblage is plasma-silt, which is a result of the accumulation of humus-type organic matter. In both cases the type of the plasma classified as humus-clay. The structure of all 3 soils investigated is crumb, inherited from the previous stages of soil formation. There are not evident features of mass aggregation in the fire affected soils. The type of the microstructure of all the soils is angular blocky or subangular blocky, which is caused by low intensity of current weathering in soil mass. The particle shape is subidiomorphic or idiomorphic in cases investigated with weak or medium degree of corrodness.

Mineral composition of the soils can be described as follows: uncoloured minerals, quarts, orthoclase and carbonates (crown fire); quarts and orthoclase with many crystals of muscovite with absence of carbonates (surface fire) and predominance of uncoloured minerals with quarts and muscovite in case of the control plot. The possibility of new minerals formation under the strong heating effect has been reported in previous works (Nobles, 2010; Leon et al., 2014), however, carbonate accumulation is not resulted from heating process in scenario of the crown fire. In some arrangements, soil microstructure can be classified as skeletal, which is caused by high content of not weathered soil particles. **No evidences of current weathering (alteration) have been fixed, but some pores infilling were recognized as a result of ash, charred material and erosion particles accumulation in fire affected soils (fig. 5). Not decomposed organic tissues and residues infills the porous media in these soils.** This is result of increment of raw forms of organic material in burned soils. Organic matter under the effect of fire was polymorphic (fig. 5, a, b) (Stoops, 1986), while it is monomorphic in the soils of the control plot. The porous media infilling after the fires was described previously by Nobles (2010), however in this case was an accumulation of Mn-Fe enriched materials. Balfour and Woods (2007) observed similar results in fire affected soils. So, taking our data into account it is possible to conclude that infilling of porous media by material of different composition is typical in burned soils. Decreasing of the porous media area was also described as result of accumulation of ash (Balfour, Woods, 2007), and this explanation of porous media infilling is more appropriate to our case. Investigated soils characterizes by developed system of porous media, this is important in sense of heating penetration into soil and soil sustainability to heating. Soils investigated are not so sustainable to heating than clay textures ones, where the porous media is not so developed. Porous, cracks and other forms of space give the possibility to the combustion products penetrate into the soil and affect the PAHs and other products accumulations.



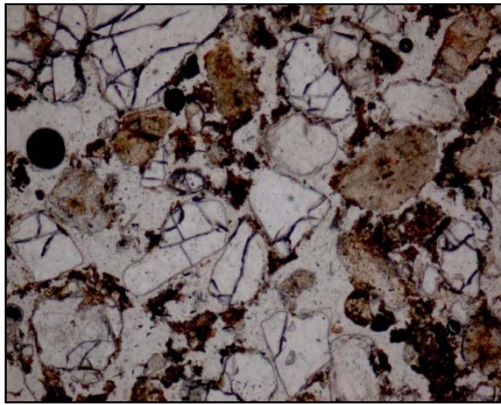

a

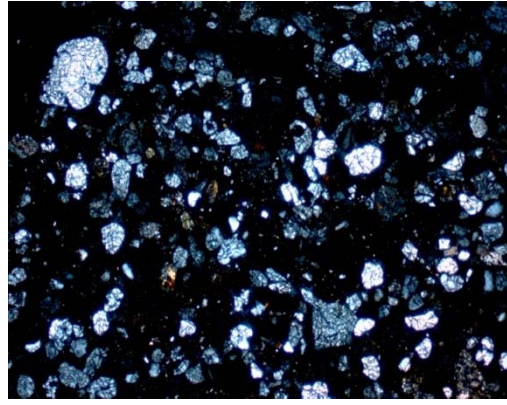

b

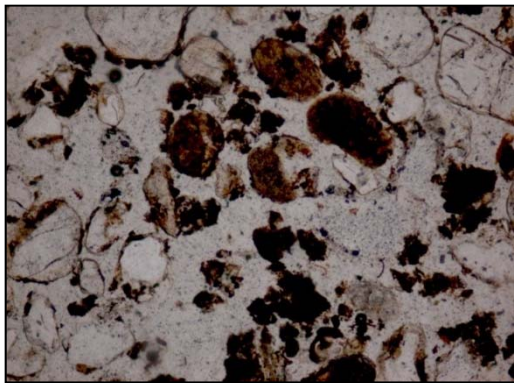

c

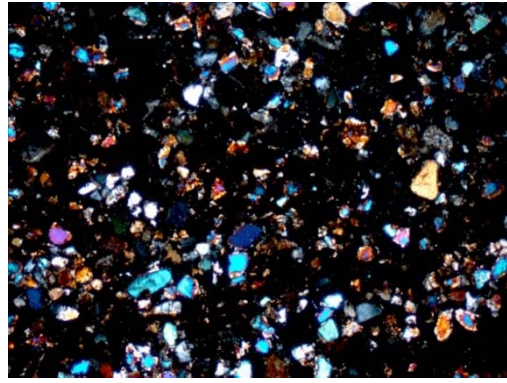

d

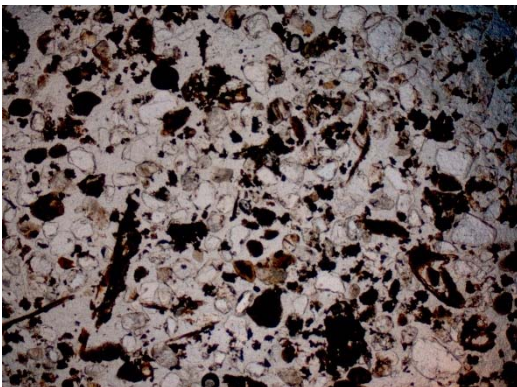

e

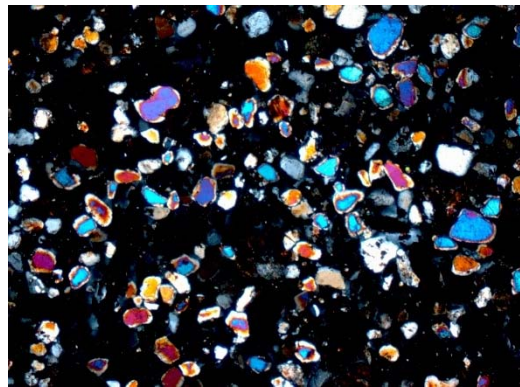

f

1 mm

1 mm

Transmitted light

Crossed nikols

1 **Figure 4: Thin sections. a, b – crown fire, c, d- surface fire, e, f- nature plot. Left column if transmitted light, right**  
2 **column – crossed nikols.**

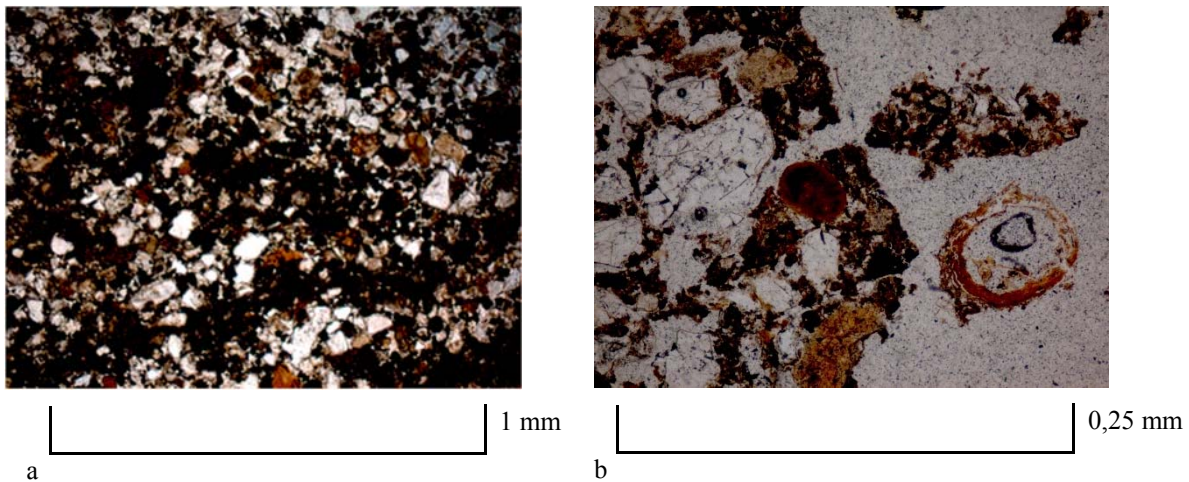

1 **Figure 5: a – humons (organic particles with not humified organic matter), transmitted light; b – organic tissues of not**  
 2 **decomposed remnants.**

3 The type of fire affected the soil organic micromorphology. The quantity of not humified organic matter in the  
 4 burned soils, especially in the samples affected by surface fire was identified as increased in burned soils (fig. 5,  
 5 a). It is also evident that the size of organic residues is higher in fire affected soils than in mature ones. In mature  
 6 soils transformation and humification of organic matter is gradual process, while new, relatively fresh not  
 7 decomposed organic matter has come into upper soil horizons in fire affected areas (Gagarina, 2004).

#### 8 **4 Conclusions**

9 The 2010 catastrophic natural fires in the urban forests of **Togljatty** resulted in the formation of pyrogenically  
 10 transformed soils, the morphological parameters and the main chemical and physical properties of which  
 11 significantly differ from those of the undisturbed soils.

12 The burnt soils differ from the control soil on the macromorphological level only in the upper part of the profile,  
 13 where the litter is transformed to ash identified as a dim-grey organomineral mixture. Processes of soil erosion are  
 14 clearly manifested a year after the fire under the effect of precipitation and the illuviation of organic matter to the  
 15 medium part of the profile and will probably continue for several years.

16 The fires significantly affect the physicochemical and chemical properties of the soils. However, the effect of fires  
 17 on the properties of the studied soils usually does not spread deeper than 10 cm.

18 The results of this work showed that mineral composition of all the soils studied is presented by quartz, feldspar  
 19 (orthoclase); in case of surface forest fire there was more mica (muscovite), and calcium carbonates appeared in  
 20 soils affected by crown forest fire, the reasons of this compound accumulation are still not well understood. The  
 21 type of plasma is humus-clay, but the soil assemblage is plasma-silt with the prevalence of the silt. Angular and  
 22 subangular grains form the main soil carcass and no evidence of intensive weathering alteration has been revealed.

23 At the same time, decreasing of the porous media was recognized as a main soil development process after the  
 24 fires. This is result of soil porous infilling by ash and charred organic material of different nature: some organic  
 25 remnants (tissues) come into the porous media after fire and some transformed, coaled and dark coloured part also  
 26 appears in post fire horizons. Partially decomposed fire affected particles of soil organic matter accumulate in  
 27 postfire soils, especially in soil porous media, which is a result of the soil organic matter accumulation and  
 28 transformation in postfire environments.

## 1 **Acknowledgements**

2 The authors thank the director of Institute of Ecology of the Volga River Basin of the Russian Academy of Sciences  
3 (IEVB RAS), Dr. professor G.S. Rosenberg, to the deputy director for science of IEVB RAS, Dr. professor S.V.  
4 Saksonov and to Dr. S.A. Senator for the help in the organization of work and research support and MSc Rita  
5 Lazareva for her kind assistance with thin sections description.

6 This work was supported by Russian foundation for Basic research, projects 14-04-32132, 15-34-20844 and Saint-  
7 Petersburg University grant № 1.37.151.2014.

## 8 **References**

9 Abakumov E.V., Gagarina E.I., and Lisitsyna O.V.: Land reclamation in the Kingisepp area of phosphorite mining,  
10 Eurasian Soil Science, 38 (6), 648-655, 2005.

11 Abakumov E.V., Gagarina E.I., Sapega V.F., and Vlasov D.Y.: Micromorphological features of the fine earth and  
12 skeletal fractions of soils of West Antarctica in the areas of Russian Antarctic stations, Eurasian Soil Science, 46  
13 (12), 1219-1229, 2013.

14 **Alexandrovskiy A.L.: Soil evolution and geographical environment. Moscow: Science, 223 p., 2005. In Russian.**

15 Balfour V., and Woods S.W.: Does wildfire ash block soil pores? A micromorphological analysis of burned soils  
16 [abstract no. H43F-1695], American Geophysical Union, Fall Meeting, 2007.

17 Bergeron S.P., Bradley R.L., Munson A., and Parsons W.: Physico-chemical and functional characteristics of soil  
18 charcoal produced at five different temperatures, Soil Biology and Biochemistry, 58, 140-146, 2013.

19 Bodi M., Martin D.A., Santin C., Balfour V., Doerr S.H., Pereira P., Cerda A., and Mataix-Solera J.: Wildland fire  
20 ash: production, composition and eco-hydro-geomorphic effects, Earth-Science Reviews, 130, 103-127, 2014.

21 Certini G.: Effects of fire on properties of forest soils: a review, Oecologia, 143, 1-10, 2005.

22 Certini G.: Fire as a soil-forming factor, Ambio, 43 (2), 191-195, <http://dx.doi.org/10.1007/s13280-013-0418-2>,  
23 2013.

24 Cheng C.H., Lehmann J., and Engelhard M.H.: Natural oxidation of black carbon in soils: Changes in molecular  
25 form and surface charge along a climosequence, Geochimica et Cosmochimica Acta, V. 72, № 6, 1598-1610,  
26 2008.

27 Cheng C.-H., Lehmann J., Thies J.E., Burton S.D., and Engelhard M.H.: Oxidation of black carbon by biotic and  
28 abiotic processes, Organic Geochemistry, V. 37, № 11, 1477-1488, 2006.

29 Czimczik C.I., and Masiello C.A.: Controls on black carbon storage in soils, Global Biogeochemical Cycles, V.  
30 21, № 3, Art. № GB3005, 2007.

31 **Delwiche J.: Post-fire soil erosion and how to manage it, JFSP Briefs, Paper 59, 2009.**

32 Dymov A.A., and Gabov D.N.: Pyrogenic alterations of Podzols at the North-east European part of Russia:  
33 Morphology, carbon pools, PAH content, Geoderma, 241-242, 230-237, 2015.

34 Francos, M., Pereira, P., Alcaniz, M., Mataix-Solera, J., and Ubeda, X.: Intense rainfall impact on soil properties  
35 in fire affected areas, Science of Total Environment, 572, 1353-1362, 2016.

36 Gagarina E.I.: Micromorphological method of soil investigation, S-Petersburg, 156, 2004.



1 Garcia-Chevesich P., Pizarro R., Stropki C.L., Ramirez de Arellano P., Ffolliott P.F., DeBano L.F., Neary D.G.,  
2 and Slack D.C.: Formation of post-fire water-repellent layers in Monterrey pine (*Pinus Radiata D. Don*)  
3 plantations in South-Central Chile, *Journal of soil science and plant nutrition*, 10 (4), 399-406, 2010.

4 Gerasimova M.I., Kovda I.V., Lebedeva M.P., and Tursina T.V.: Micromorphological terms: the state of the art in  
5 soil microfabric research, *Eurasian Soil Science*, 44 (7), 804-817, 2011.

6 Gonet S.S., Dziadowiec H., and Bućko M.: Profile morphology, chemical properties and organic matter stocks in  
7 soils after pine forest fire, *Roczniki Gleboznawcze - Soil Science Annual*, 60(2), 32-38, 2009.

8 González-Pérez J.A., González-Vila F.J., Almendros G., and Knicker H.: The effect of fire on soil organic matter  
9 – A review, *Environment International*, V. 30, № 6, 855-870, 2004.

10 Greene R.S.B., Chartres C.J., and Hodgkinson K.C.: The effects of fire on the soil in a degraded semiarid woodland  
11 I. Cryptogam cover and physical and micromorphological properties, *Australian Journal of Soil Research*, 28(5),  
12 755-777, 1990.

13 Guénon R., Vennetier M., Dupuy N., Roussos S., Pailler A., and Gros R.: Trends in recovery of Mediterranean  
14 soil chemical properties and microbial activities after infrequent and frequent wildfires, *Land Degradation &*  
15 *Development*, 24, 115-128, DOI 10.1002/ldr.1109, 2013.

16 Jain Theresa B., Pilliod David S., Graham Russell T., Lentile Leigh B., and Sandquist Jonathan E.: Index for  
17 characterizing post-fire soil environments in temperate coniferous forests, *Forests*, 3, 445-466,  
18 doi:10.3390/f3030445, 2012.

19 Knicker H., Hilscher A., de la Rosa J.M., GonzálezPérez J.A., and González-Vila F.J.: Modification of biomarkers  
20 in pyrogenic organic matter during the initial phase of charcoal biodegradation in soils, *Geoderma*, V. 197–198,  
21 43-50, 2013.

22 Kubiena W.L.: *Micropedology*, Ames, Iowa: Collegiate press, 243 p., 1938.

23 Kubiena W.L.: *Micromorphological features of Soil geography*, New Jersey: Rutgers University Press, 254 p.,  
24 1970.

25 Lebedeva M., Gerasimova M., and Golovanov D.: Systematization of the topsoil fabrics in soils of the arid lands  
26 in northwest of central Asia, *World Congress of Soil Science, Soil Solutions for a Changing World (1-6 August*  
27 *2010)*, Brisbane, Australia, Published on DVD, 96, 2010.

28 Leon J., Seeger M., Badia D., Peters P., Echaverría M.T. 2014. Thermal shock and splash effect on burned  
29 gypseous soils from the Ebro Basin (NE Spain). *Solid Earth*, 5: 131-140.

30 Leslie Ian, Heinse Robert, Smith Alistair Matthew Stuart, Mcdaniel Paul A. 2014. Root Decay and Fire Affect  
31 Soil Pipe Formation and Morphology in Forested Hillslopes with Restrictive Horizons. *Soil science society of*  
32 *America journal*, 78(4):1448-1457. DOI: 10.2136/sssaj2014.01.0008.

33 Liu G., Niu Z., Niekerk D., Xue J., and Zheng L.: Polycyclic aromatic hydrocarbons (PAHs) from coal combustion:  
34 emissions, analysis, and toxicology, *Rev. Environ. Contam. Toxicol.*, V. 192, 1-28, 2008.

35 Maksimova E., and Abakumov E.: Wildfire effects on ash composition and biological properties of soils in forest-  
36 steppe ecosystems of Russia, *Environmental Earth Sciences*, 74, 4395–4405, DOI 10.1007/s12665-015-4497-1,  
37 2015.

38 Marschner B., Brodowski S., Dreves A., Gleixner G., Gude A., Grootes P.M., Hamer U., Heim A., Jandl G., Ji R.,  
39 Kaiser K., Kalbitz K., Kramer C., Leinweber P., Rethemeyer J., Schäffer A., Schmidt M.W.I., Schwark L., and

1 Wiesenberg G.L.B.: How relevant is recalcitrance for the stabilization of organic matter in soils? J. Plant Nutrition  
2 and Soil Science, V. 171, № 1, 91-110, 2008.

3 Mataix-Solera J., Cerdà A., Arcenegui V., Jordán A., and Zavala L.M.: Fire effects on soil aggregation: a review,  
4 Earth-Science Reviews, 109, 44-60, <http://dx.doi.org/10.1016/j.earscirev.2011.08.002>, 2011.

5 Mataix-Solera J., Gomez I., Navarro-Perdenno J., Guerrero C., and Moral R.: Soil organic matter and aggregates  
6 affected by wildfire in a *Pinus halepensis* forest in a Mediterranean environment, International Journal of Wildland  
7 Fire, 11(2), 107-114, 2002.

8 **Methods of Soil Analysis. Part 3 Chemical Methods. Wisconsin, USA: Soil Science Society of America Inc.,  
9 American Society of Agronomy Inc. 677, South Segoe Road, Madison. 1996.**

10 Nguyen B.T., and Lehmann J.: Black carbon decomposition under varying water regimes, Organic Geochemistry,  
11 V. 40, № 8, 846-853, 2009.

12 Nguyen B.T., Lehmann J., Hockaday W.C., Joseph S., and Masiello C.A.: Temperature sensitivity of black carbon  
13 decomposition and oxidation, Environmental Science and Technology, V. 44, № 9, 3324-3331, 2010.

14 Nobles M.M.: Mineralogical and micromorphological modification in soil affected by slash pile burn, Abstracts  
15 of IV International conference on Forest Fire Research (15-18 November 2010), Coimbra, Portugal, 2010.

16 Ouyang L., Wang F., Tang J., Yu L., and Zhang R.: Effects of biochar amendment on soil aggregates and hydraulic  
17 properties, Journal of soil science and plant nutrition, 13 (4), 991-1002, 2013.

18 Pereira P., Cerdà A., Úbeda X., Mataix-Solera J., Arcenegui V., and Zavala L.: Modelling the impacts of wildfire  
19 on ash thickness in a short-term period, Land Degradation and Development, 26, 180-192, 2015.

20 Pereira P., Ubeda X., Martin D.A., Mataix-Solera J., Oliva M., and Novara A.: Short-term spatio-temporal spring  
21 grassland fire effects on soil colour, organic matter and water repellency in Lithuania, Solid Earth, 5, 209-225,  
22 2014.

23 Razumovskiy S.M.: Ecosystems dynamics (Zakonomernosti dymaniki biogeocenosoov), Moscow: Science, 234 p.,  
24 1981.

25 **Robichaud P.R.: Measurement of post-fire hillslope erosion to evaluate and model rehabilitation treatment  
26 effectiveness and recovery, Int. Journal of Wildland Fire, 14, 475-485, 2005.**

27 Saksonov S.V.: Samarskaya Luka flora phenomenon, Moscow: Science, 263 pp., 2006.

28 Sapozhnikov A.P., Karpachevskij L.O., and Il'ina, L.S.: Postfire soil formation in cedar broad-leaved forests,  
29 Transactions of Moscow Forest institute - Forestry journal, 1, 132-165, 2001.

30 Sedov S.N., Sycheva S., Targulian V., Pi T., and Diaz J.: Last Interglacial paleosols with Argic horizons in upper  
31 Austria and Central Russia – pedogenetic and paleoenvironmental inferences from comparison with Holocene  
32 analogues, Quaternary Science Journal, 62 (1), 44-58, 2013.

33 Shishov L.L., and Tonkonogov V.D.: Classification and diagnostics of Russian soils, Moscow, Russia: Soil  
34 institute of Dokuchayev, 341 pp., 2004.

35 Stoops G.: Guidelines for analysis and description of soil and regolith thin section, Published by soil Sci. Soc. Am.  
36 Inc. Madison, Wisconsin, USA, 184 p., 2003.

37 Stoops G.: Evaluation of Kubiena's contribution to micropedology. At the Occasion of the Seventieth Anniversary  
38 of His book "Micropedology", Eurasian Soil Science, 42(6), 693-698, 2009.

39 Stoops G., and Eswaran H.: Soil micromorphology, New York: Van Nostrands Reinhold Company, 345 p., 1986.

- 1 Vieira A., Bento-Gonçalves A., Lourenço L., Nunes A., Meira-Castro A., and Ferreira-Leite F.: Soil erosion after  
2 forest fires: evaluation of mitigation measures applied to drainage channels in the northwest of Portugal,  
3 FLAMMA, 5 (3), 127-129, 2014.
- 4 World reference base for soil resources. International soil classification system for naming soils and creating  
5 legends for soil maps. 2014, FAO, Rome, 2015.
- 6 Zharikova Ye.A.: Post-pyrogenic soil transformation in the forests of the lower Amur region, Bulletin of Altai  
7 state agricultural university, 8 (130), 57-61, 2015.
- 8

1 **Table 1. Morphological features and general properties of soils,  $\pm$  after the mean value means SD**

| Horizon           | Depth, cm | Colour     | Soil humidity, % | Ignition loss value (%) | pH       | Total organic carbon, g·kg <sup>-1</sup> | C <sub>ha</sub> /C <sub>fs</sub> | Clay content, g·kg <sup>-1</sup> | Sand content, g·kg <sup>-1</sup> |
|-------------------|-----------|------------|------------------|-------------------------|----------|------------------------------------------|----------------------------------|----------------------------------|----------------------------------|
| Surface fire      |           |            |                  |                         |          |                                          |                                  |                                  |                                  |
| Apyr              | 0-3       | 10 YR 3/2  | 2.85±0.79        | 5.68±0.95               | 8.0±0.06 | 23.1±0.27                                | 2.14±0.13                        | 20.0                             | 705.0                            |
| AY                | 5-14      | 10 YR 4/2  | 1.45±0.19        | 2.79±0.60               | 6.2±0.32 | 12.1±0.50                                | 1.30±0.26                        | 25.0                             | 807.0                            |
| AC                | 14-27     | 7.5 YR 5/4 | 1.38±0.36        | 1.55±1.16               | 6.0±0.21 | 7.5±0.48                                 | nd                               | 26.0                             | 835.0                            |
| AC                | 27-36     | 10 YR 6/4  | 1.02±0.27        | 0.80±0.49               | 5.8±0.21 | 3.1±0.13                                 | «                                | 19.0                             | 852.0                            |
| AC                | 36-53     | 10 YR 6/4  | 0.98±0.42        | 0.98±0.73               | 5.3±0.31 | 2.2±0.05                                 | «                                | 24.0                             | 866.0                            |
| C                 | 53-73     | 7.5 YR 5/4 | 0.69±0.05        | 0.81±0.05               | 5.7±0.21 | 2.4±0.10                                 | «                                | 13.0                             | 864.0                            |
| Crown fire        |           |            |                  |                         |          |                                          |                                  |                                  |                                  |
| Apyr              | 0-5       | 10 YR 3/2  | 2.37±0.36        | 5.45±1.41               | 7.9±0.12 | 31.9±0.19                                | 1.95±0.34                        | 17.0                             | 720.0                            |
| AY                | 3-10      | 10 YR 4/2  | 1.43±0.35        | 3.01±1.31               | 5.9±0.38 | 14.2±0.31                                | 1.18±0.11                        | 20.0                             | 788.0                            |
| AC                | 10-15     | 7.5 YR 5/2 | 0.86±0.20        | 2.91±3.01               | 5.9±0.25 | 7.8±0.07                                 | nd                               | 17.0                             | 852.0                            |
| AC                | 15-24     | 10 YR 7/4  | 1.11±0.63        | 0.86±0.29               | 5.9±0.36 | 2.6±0.07                                 | «                                | 6.0                              | 862.0                            |
| C                 | 24-44     | 10 YR 6/3  | 0.52±0.05        | 0.66±0.14               | 5.7±0.12 | 1.4±0.05                                 | «                                | 4.0                              | 867.0                            |
| C                 | 44-64     | 10 YR 6/3  | 0.49±0.03        | 0.63±0.09               | 5.9±0.25 | 1.2±0.05                                 | «                                | 9.0                              | 868.0                            |
| Control           |           |            |                  |                         |          |                                          |                                  |                                  |                                  |
| O                 | 0-7       | -          | 5.92±2.27        | 20.88±5.90              | 6.5±0.10 | nd                                       | 1.17±0.18                        | nd                               | nd                               |
| AY                | 7-10      | 10 YR 4/2  | 1.60±0.47        | 2.71±1.34               | 6.3±0.06 | 19.4±1.35                                | 0.67±0.13                        | 21.0                             | 787.0                            |
| AY                | 10-14     | 10 YR 6/4  | 0.78±0.15        | 1.57±0.82               | 6.2±0.23 | 7.8±0.33                                 | nd                               | 18.0                             | 837.0                            |
| AC                | 14-23     | 7.5 YR 3/2 | 0.78±0.42        | 0.66±0.50               | 6.1±0.23 | 3.3±0.10                                 | «                                | 13.0                             | 867.0                            |
| AC                | 23-33     | 2.5 YR 8/6 | 0.42±0.01        | 0.57±0.12               | 5.9±0.20 | 1.5±0.02                                 | «                                | 4.0                              | 888.0                            |
| C                 | 33-50     | 2.5 YR 8/6 | 0.33±0.02        | 0.46±0.01               | 5.7±0.12 | 2.1±0.03                                 | «                                | 7.0                              | 891.0                            |
| C                 | 50-70     | 2.5 YR 8/6 | 0.32±0.03        | 0.52±0.17               | 5.8±0.31 | 1.5±0.05                                 | «                                | 3.0                              | 895.0                            |
| Post hoc test     |           |            |                  |                         |          |                                          |                                  |                                  |                                  |
| Crown – Control   |           |            |                  |                         |          | p<0.05                                   |                                  | p<0.06                           | p<0.07                           |
| Surface – Control |           |            |                  |                         |          | p<0.01                                   |                                  | p<0.04                           | p<0.02                           |
| Crown-Surface     |           |            |                  |                         |          | p<0.02                                   |                                  | p<0.08                           | p<0.09                           |

2

3



1 Table 2. Micromorphological characteristics of the soils under investigation

| Horizon             | Sampling depth (cm) | Skeleton grains |                           |          |      |              |                |                                                               |                      |                     |                                                                                           | Type of plasma | Elementary assemblage                                     | Plant residues        |                                | Soil microstructure | Coprolites           |                                          |       |                                                  |             |
|---------------------|---------------------|-----------------|---------------------------|----------|------|--------------|----------------|---------------------------------------------------------------|----------------------|---------------------|-------------------------------------------------------------------------------------------|----------------|-----------------------------------------------------------|-----------------------|--------------------------------|---------------------|----------------------|------------------------------------------|-------|--------------------------------------------------|-------------|
|                     |                     | %               | Character of distribution | Size, mm |      | Size sorting | Particle shape | Rounding                                                      | Corrosion            | Mineral composition | Type of plasma                                                                            |                |                                                           | Elementary assemblage | %                              |                     | Decomposition degree | Structural separates                     | Voids | Size, mm                                         | Description |
|                     |                     |                 |                           | max      | min  |              |                |                                                               |                      |                     |                                                                                           |                |                                                           |                       |                                |                     |                      |                                          |       |                                                  |             |
| Crown forest fire   |                     |                 |                           |          |      |              |                |                                                               |                      |                     |                                                                                           |                |                                                           |                       |                                |                     |                      |                                          |       |                                                  |             |
| Apyr                | 0-15                | 40-50           | Uniform                   | 0.07     | 0.01 | 0.04         | good-medium    | subidiomorphic, xeromorphic regenerate (some minerals in one) | rounded              | weak                | colorless minerals are prevail: quartz, feldspar (orthoclase), carbonates (calcispar)     | humus-clay     | plasma-silt (little plasma, most of all – silt particles) | 10                    | weak-medium                    | aggregates          | pores                | pore structure with separated aggregates |       |                                                  |             |
| Surface forest fire |                     |                 |                           |          |      |              |                |                                                               |                      |                     |                                                                                           |                |                                                           |                       |                                |                     |                      |                                          |       |                                                  |             |
| Apyr                | 0-14                | 40-50           | Uniform                   | 0.07     | 0.01 | 0.01         | medium-weak    | idiomorphic, subidiomorphic, xeromorphic                      | rounded, not rounded | medium              | a lot of specular stone (muscovite), quartz, feldspar (orthoclase)                        | humus-clay     | plasma-silt                                               | 5                     | weak                           | aggregates          | pores                | pore structure with separated aggregates | 0,4   | brown, roundish, harsh with minerals (calcispar) |             |
| Control             |                     |                 |                           |          |      |              |                |                                                               |                      |                     |                                                                                           |                |                                                           |                       |                                |                     |                      |                                          |       |                                                  |             |
| O                   | 0-20                | 40-50           | Uniform                   | 0.09     | 0.01 | 0.02         | good-medium    | idiomorphic, subidiomorphic, xeromorphic                      | rounded, not rounded | weak                | colorless minerals are prevail: quartz, feldspar (orthoclase), specular stone (muscovite) | humus-clay     | plasma-silt (little plasma, most of all – silt particles) | 30                    | weak-medium, strong is prevail | aggregates          | pores                | pore structure with separated aggregates |       |                                                  |             |

2
